# Supplementary material
Source: PubMed Central journal article supplement (PMC3294759)

## **SUPPLEMENTARY MATERIAL**

### **Glutamate Dehydrogenase Affects Resistance to Cell Wall Antibiotics in *Bacillus subtilis***

Yong Heon Lee, Anthony W. Kingston, and John D. Helmann\*

Department of Microbiology, Cornell University, Ithaca, NY 14853-8101, USA.

**TABLE S1. Sequences of primers used in this study**

| Primer no. | Name               | Oligonucleotide sequence, 5'→3' <sup>a</sup>                |
|------------|--------------------|-------------------------------------------------------------|
| 5012       | rocG up-fwd        | TCGCGAATTATGAAAAAGCG                                        |
| 5013       | rocG up-rev (spec) | <b>CGTTACGTTATTAGCGAGCCAGTCTCTTCATCTTTCGAGACTTGCTT</b>      |
| 5046       | rocG do-fwd (spec) | <b>CAATAAACCCCTTGCCCTCGCTACGATCAAACAGCGGCAACACAT</b>        |
| 5047       | rocG do-rev        | GCGCGCGTAGAACTCTAAAA                                        |
| 5387       | gudB up-fwd        | TTAACCCCTCGATGATTTGACAGA                                    |
| 5388       | gudB up-rev (kan)  | <b>CCTATCACCTCAAATGGTTCGCTGGTTTGTCCTCTTCTGTATGACCG</b>      |
| 5389       | gudB do-fwd (kan)  | <b>CGAGCGCCTACGAGGAATTTGTATCGCGGTGGCGTAACAGTTTCTT</b>       |
| 5390       | gudB do-rev        | ACTTTCGGCAAATCCTCACC                                        |
| 5391       | gudB-seq F         | CGGTAATGCCGTAGAAACGA                                        |
| 5392       | gudB-seq R         | CCAGCAGCTCTTGGTTGGTA                                        |
| 5395       | rocG Pspac-F       | <b>CC<u>AGCTT</u>CATTACAGCCGGCCAAAAA</b>                    |
| 5396       | rocG Pspac-R       | <b>GCT<u>CTAGA</u>TGCGGAGGCTTCTCAAATTA</b>                  |
| 5403       | yqeZ qRT-F         | ATTGTTGATGGCCAAGGCAATGCCGCT                                 |
| 5404       | yqeZ qRT-R         | TGGGTACGCCATTGCGAGCGCATATTT                                 |
| 5411       | yuaF qRT-F         | TCTGTCAAGCTTGCTGATTGCGCT                                    |
| 5412       | yuaF qRT-R         | TGACCACTTACCAAACCCGTCAA                                     |
| 4368       | 23S-RT-F           | AAAGGCACAAGGGAGCTTGACTGCGAGA                                |
| 4369       | 23S-RT-R           | ATGAGCCGACATCGAGGTGCCAAACCT                                 |
| 5413       | yuaF up-fwd        | TCAGCGAAAAGTCAAACGAAA                                       |
| 5414       | yuaF up-rev (mls)  | <b>GAGGGTTGCCAGAGTTAAAGGATCCCCGCAATAATAAGCGTATAAA<br/>G</b> |
| 5415       | yuaG do-fwd (mls)  | <b>CGATTATGTCCTTTTGCGCAGTCGGCGTAAGGAAAGGGCAGAACCG</b>       |
| 5416       | yuaG do-rev        | TCAGGAGCTGTGTTTTTCGG                                        |
| 5417       | yuaG up-fwd        | CTTTCCCGAGGTGTCTCGT                                         |
| 5418       | yuaG up-rev (mls)  | <b>GAGGGTTGCCAGAGTTAAAGGATCATTAAACGCTTCATCAGGCC</b>         |
| 5419       | yuaI up-fwd        | CCAGCAAGTCACAGAGCAGG                                        |
| 5420       | yuaI up-rev (mls)  | <b>GAGGGTTGCCAGAGTTAAAGGATCTTCGTGGTATGTTGTCCTCCA</b>        |
| 5421       | yuaI do-fwd (mls)  | <b>CGATTATGTCCTTTTGCGCAGTCGGCGAAATTGCCGAGTAAGGCT</b>        |
| 5422       | yuaI do-rev        | CTTTTCTCATCCTTCCGCGT                                        |
| 5561       | yuaFG Pspac-F      | GCGCCCCGGGTGCATTGATGAAGAAAGGATGA                            |
| 5563       | yuaFG Pspac-R      | GCGCT <u>CTAGA</u> ACCATAACGGTTCTGCCCTTT                    |

<sup>a</sup> Restriction sites are underlined, and the sequences complementary to antibiotic resistance cassettes for LFH PCR are in boldface.

**FIG. S1. Isolation of *gudB* gain-of-function mutants.** The *rocG* mutant cells were streaked on LB or DSM agar plates, incubated overnight at 37 °C, and the plates were then kept at room temperature for 3 weeks. The gain-of-function mutations in *gudB* (*gudB*<sup>+</sup>) were confirmed by DNA sequencing.

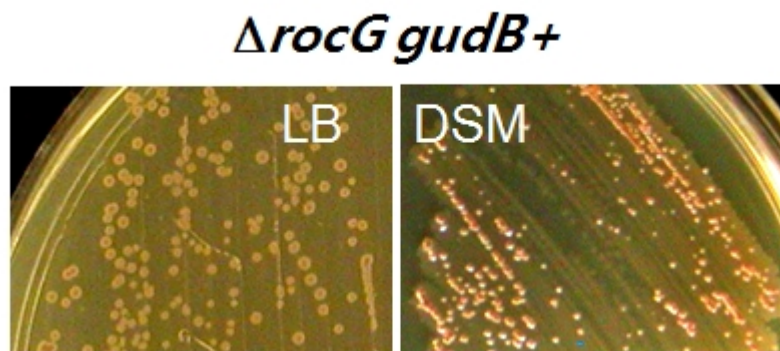

Supplement: supp_194.5.993_TableS1-FigS1.pdf [file supp_194.5.993_TableS1-FigS1.pdf]
